# Supplementary material
Source: HighWire-hosted journal article supplement (https://bmjopen.bmj.com/content/12/7/e057386)
Supplement: inline-supplementary-material-1 [file inline-supplementary-material-1.pdf]

**Ovid MEDLINE(R) <1946 to September 02, 2021>**

Search history sorted by search number ascending

| #  | Searches                                                           | Results | Type     |
|----|--------------------------------------------------------------------|---------|----------|
| 1  | Epidemics/                                                         | 12059   | Advanced |
| 2  | Pandemics/                                                         | 64607   | Advanced |
| 3  | epidemic?.mp,kw.                                                   | 106246  | Advanced |
| 4  | pandemic?.mp,kw.                                                   | 96739   | Advanced |
| 5  | ((infectious or communicable) adj3 disease? adj3 outbreak*).mp,kw. | 1880    | Advanced |
| 6  | or/1-5 <b>[pandemic terms]</b>                                     | 195548  | Advanced |
| 7  | exp Coronavirus/                                                   | 91931   | Advanced |
| 8  | exp Coronavirus Infections/                                        | 112700  | Advanced |
| 9  | Severe Acute Respiratory Syndrome/                                 | 5605    | Advanced |
| 10 | SARS-CoV-2/                                                        | 79313   | Advanced |
| 11 | SARS Virus/                                                        | 3946    | Advanced |
| 12 | Middle East Respiratory Syndrome Coronavirus/                      | 1675    | Advanced |
| 13 | COVID-19/                                                          | 102073  | Advanced |
| 14 | Severe Acute Respiratory Syndrome/                                 | 5605    | Advanced |
| 15 | (coronavirus* or corona virus*).mp,kw.                             | 77726   | Advanced |
| 16 | (coronavirinae* or corona virinae*).mp,kw.                         | 21      | Advanced |
| 17 | (txid1898672 or txid 1898672).mp,kw.                               | 0       | Advanced |
| 18 | alphacoronavirus*.mp,kw.                                           | 236     | Advanced |
| 19 | (txid693996 or txid 693996).mp,kw.                                 | 0       | Advanced |
| 20 | betacoronavirus*.mp,kw.                                            | 33601   | Advanced |
| 21 | (txid694002 or txid 694002).mp,kw.                                 | 0       | Advanced |
| 22 | covid*.mp,kw.                                                      | 105083  | Advanced |
| 23 | ncovid*.mp,kw.                                                     | 18      | Advanced |
| 24 | HCoV*.mp,kw.                                                       | 866     | Advanced |
| 25 | NCoV?????.mp,kw.                                                   | 1444    | Advanced |
| 26 | (CoV2* or CoV-2*).mp,kw.                                           | 85424   | Advanced |
| 27 | (CoV19 or CoV-19).mp,kw.                                           | 86      | Advanced |
| 28 | (CoV2019 or CoV-2019).mp,kw.                                       | 17      | Advanced |
| 29 | (2019nCoV or 2019-nCoV).mp,kw.                                     | 1207    | Advanced |
| 30 | (SARS-CoV* or SARSCoV*).mp,kw.                                     | 87752   | Advanced |
| 31 | (2019nCoV* or 2019-nCoV*).mp,kw.                                   | 1219    | Advanced |

|    |                                                          |        |          |
|----|----------------------------------------------------------|--------|----------|
| 32 | (SARS or SARSr).mp,kw.                                   | 93962  | Advanced |
| 33 | (severe acute respiratory adj2 syndrome*).mp,kw.         | 20165  | Advanced |
| 34 | (txid694009 or txid 694009).mp,kw.                       | 0      | Advanced |
| 35 | (middle eastern respiratory adj2 syndrome*).mp,kw.       | 61     | Advanced |
| 36 | MERS.mp,kw.                                              | 5204   | Advanced |
| 37 | (MERSCoV* or MERS-Cov*).mp,kw.                           | 2311   | Advanced |
| 38 | (txid1335626 or txid 1335626).mp,kw.                     | 0      | Advanced |
| 39 | <b>or/7-38 [coronavirus (covid-19, MERS, SARS) terms</b> | 130012 | Advanced |
| 40 | Influenza A virus/                                       | 21585  | Advanced |
| 41 | Influenza A Virus, H1N1 Subtype/                         | 16283  | Advanced |
| 42 | Influenza A Virus, H2N2 Subtype/                         | 232    | Advanced |
| 43 | Influenza A Virus, H3N2 Subtype/                         | 4501   | Advanced |
| 44 | Influenza Pandemic, 1918-1919/                           | 198    | Advanced |
| 45 | influenza A.mp,kw.                                       | 52137  | Advanced |
| 46 | flu A.mp,kw.                                             | 404    | Advanced |
| 47 | fowl plague virus*.mp,kw.                                | 379    | Advanced |
| 48 | grippe.mp,kw.                                            | 1271   | Advanced |
| 49 | pestis galli myxovirus*.mp,kw.                           | 0      | Advanced |
| 50 | orthomyxovirus*.mp,kw.                                   | 333    | Advanced |
| 51 | (txid11320 or txid 11320).mp,kw.                         | 0      | Advanced |
| 52 | H1N1.mp,kw.                                              | 20516  | Advanced |
| 53 | (spanish adj2 (influenza?? or flu)).mp,kw.               | 457    | Advanced |
| 54 | ((("1918" or "1919") adj2 (influenza?? or flu)).mp,kw.   | 905    | Advanced |
| 55 | (russian* adj2 (influenza?? or flu)).mp,kw.              | 35     | Advanced |
| 56 | ("1977" adj2 (influenza?? or flu)).mp,kw.                | 35     | Advanced |
| 57 | (swine adj2 (influenza?? or flu)).mp,kw.                 | 2886   | Advanced |
| 58 | ("2009" adj2 (influenza?? or flu)).mp,kw.                | 3456   | Advanced |
| 59 | (txid114727 or txid 114727).mp,kw.                       | 0      | Advanced |
| 60 | H2N2.mp,kw.                                              | 664    | Advanced |
| 61 | (asian adj2 (influenza?? or flu)).mp,kw.                 | 597    | Advanced |
| 62 | ((("1957" or "1958") adj2 (influenza?? or flu)).mp,kw.   | 155    | Advanced |
| 63 | H3N2.mp,kw.                                              | 7665   | Advanced |
| 64 | (hong kong adj2 (influenza?? or flu)).mp,kw.             | 543    | Advanced |
| 65 | ((("1968" or "1969") adj2 (influenza?? or flu)).mp,kw.   | 107    | Advanced |
| 66 | (fujian adj2 (influenza?? or flu)).mp,kw.                | 16     | Advanced |

|    |                                                                                                   |        |          |
|----|---------------------------------------------------------------------------------------------------|--------|----------|
| 67 | ((("2003" or "2004") adj2 (influenza?? or flu)).mp,kw.                                            | 382    | Advanced |
| 68 | (txid119210 or txid 119210).mp,kw.                                                                | 0      | Advanced |
| 69 | or/40-68 [ <b>Influenza A terms</b> ]                                                             | 57166  | Advanced |
| 70 | exp HIV Infections/                                                                               | 295610 | Advanced |
| 71 | exp HIV/                                                                                          | 102665 | Advanced |
| 72 | HIV Long-Term Survivors/                                                                          | 782    | Advanced |
| 73 | HIV Testing/                                                                                      | 285    | Advanced |
| 74 | AIDS Serodiagnosis/                                                                               | 6737   | Advanced |
| 75 | hiv.mp,kw.                                                                                        | 343908 | Advanced |
| 76 | hiv??.mp,kw.                                                                                      | 346169 | Advanced |
| 77 | htlv*.mp,kw.                                                                                      | 13362  | Advanced |
| 78 | human t-cell leukemia virus*.mp,kw.                                                               | 3334   | Advanced |
| 79 | (acquired adj3 immun* adj3 (syndrome* or virus*)).mp,kw.                                          | 92284  | Advanced |
| 80 | (human* adj3 immun* adj3 deficien* adj3 virus*).mp,kw.                                            | 688    | Advanced |
| 81 | (human* adj3 immun* adj3 virus*).mp,kw.                                                           | 96261  | Advanced |
| 82 | (syndrome* adj3 lymphadenopath*).mp.                                                              | 460    | Advanced |
| 83 | (lymphadenopath* adj3 (related or associated) adj3 (virus* or retrovirus* or lentivirus*)).mp,kw. | 321    | Advanced |
| 84 | slim disease.mp,kw.                                                                               | 25     | Advanced |
| 85 | lav-htlv-iii.mp,kw.                                                                               | 210    | Advanced |
| 86 | (sbl-6669 or sbl6669).mp,kw.                                                                      | 25     | Advanced |
| 87 | (lav-2 or lav2).mp,kw.                                                                            | 30     | Advanced |
| 88 | sbl6669.mp,kw.                                                                                    | 9      | Advanced |
| 89 | (acquired adj3 immun* adj3 deficien* adj3 syndrome*).mp,kw.                                       | 5755   | Advanced |
| 90 | (aids adj10 (disease* or syndrome*)).mp,kw.                                                       | 31323  | Advanced |
| 91 | (aids adj3 associated adj3 (virus* or retrovirus* or lentivirus*)).mp,kw.                         | 170    | Advanced |
| 92 | (aids adj2 related).mp.                                                                           | 31174  | Advanced |
| 93 | or/70-92 [ <b>HIV/AIDS terms</b> ]                                                                | 413152 | Advanced |
| 94 | Hemorrhagic Fever, Ebola/                                                                         | 5996   | Advanced |
| 95 | Ebolavirus/                                                                                       | 3579   | Advanced |
| 96 | ebola*.mp,kw.                                                                                     | 8884   | Advanced |
| 97 | EVD.mp,kw.                                                                                        | 1847   | Advanced |
| 98 | EHF.mp,kw.                                                                                        | 591    | Advanced |
| 99 | txid?128951.mp,kw.                                                                                | 0      | Advanced |

|     |                                                                                                                                               |        |          |
|-----|-----------------------------------------------------------------------------------------------------------------------------------------------|--------|----------|
| 100 | txid?186536.mp,kw.                                                                                                                            | 0      | Advanced |
| 101 | or/94-100 [ <b>ebola terms</b> ]                                                                                                              | 10290  | Advanced |
| 102 | Zika Virus Infection/                                                                                                                         | 5437   | Advanced |
| 103 | Zika Virus/                                                                                                                                   | 4849   | Advanced |
| 104 | zika.mp,kw.                                                                                                                                   | 7732   | Advanced |
| 105 | zikkv.mp,kw.                                                                                                                                  | 2920   | Advanced |
| 106 | txid?64320.mp,kw.                                                                                                                             | 0      | Advanced |
| 107 | or/102-106 [ <b>zika virus terms</b> ]                                                                                                        | 7748   | Advanced |
| 108 | West Nile Fever/                                                                                                                              | 4294   | Advanced |
| 109 | West Nile virus/                                                                                                                              | 4802   | Advanced |
| 110 | (west nile adj2 virus*).mp,kw.                                                                                                                | 7041   | Advanced |
| 111 | (west nile adj2 flavivirus*).mp,kw.                                                                                                           | 199    | Advanced |
| 112 | (west nile adj2 infection?).mp,kw.                                                                                                            | 982    | Advanced |
| 113 | (west nile adj2 fever?).mp,kw.                                                                                                                | 4552   | Advanced |
| 114 | (west nile adj2 encephalitis).mp,kw.                                                                                                          | 544    | Advanced |
| 115 | (west nile adj2 meningitis).mp,kw.                                                                                                            | 17     | Advanced |
| 116 | (west nile adj2 meningoencephalitis).mp,kw.                                                                                                   | 39     | Advanced |
| 117 | (west nile adj2 myelitis).mp,kw.                                                                                                              | 3      | Advanced |
| 118 | (egypt 101 adj2 virus*).mp,kw.                                                                                                                | 7      | Advanced |
| 119 | (egypt 101 adj2 flavivirus*).mp,kw.                                                                                                           | 0      | Advanced |
| 120 | (kunjin adj2 virus*).mp,kw.                                                                                                                   | 245    | Advanced |
| 121 | (kunjin adj2 flavivirus*).mp,kw.                                                                                                              | 59     | Advanced |
| 122 | WNV.mp,kw.                                                                                                                                    | 3673   | Advanced |
| 123 | txid11077.mp,kw.                                                                                                                              | 0      | Advanced |
| 124 | txid11082.mp,kw.                                                                                                                              | 0      | Advanced |
| 125 | or/108-124 [ <b>west nile terms</b> ]                                                                                                         | 7831   | Advanced |
| 126 | 6 or 39 or 69 or 93 or 101 or 107 or 125 [ <b>pandemics or coronaviruses or influenza a or hiv/aids or ebola or zika or west nile terms</b> ] | 698339 | Advanced |
| 127 | Financing, Government/                                                                                                                        | 21166  | Advanced |
| 128 | Public Assistance/                                                                                                                            | 2969   | Advanced |
| 129 | Food Assistance/                                                                                                                              | 1397   | Advanced |
| 130 | Medical Assistance/                                                                                                                           | 2525   | Advanced |
| 131 | Workers' Compensation/                                                                                                                        | 7645   | Advanced |
| 132 | exp Charities/                                                                                                                                | 3950   | Advanced |

|     |                                                                                                                                                 |       |          |
|-----|-------------------------------------------------------------------------------------------------------------------------------------------------|-------|----------|
| 133 | Child Welfare/                                                                                                                                  | 22226 | Advanced |
| 134 | Aid to Families with Dependent Children/                                                                                                        | 752   | Advanced |
| 135 | Foundations/ec [Economics]                                                                                                                      | 686   | Advanced |
| 136 | Relief Work/                                                                                                                                    | 4103  | Advanced |
| 137 | Sick Leave/                                                                                                                                     | 6248  | Advanced |
| 138 | Family Leave/                                                                                                                                   | 357   | Advanced |
| 139 | Parental Leave/                                                                                                                                 | 756   | Advanced |
| 140 | Insurance, Disability/                                                                                                                          | 1526  | Advanced |
| 141 | Financial Support/                                                                                                                              | 3856  | Advanced |
| 142 | Social Security/                                                                                                                                | 7663  | Advanced |
| 143 | (economic adj2 (payment? or plan or plans or program* or intervention?)).mp,kw.                                                                 | 943   | Advanced |
| 144 | (economic adj3 (relief or support*)).mp,kw.                                                                                                     | 1369  | Advanced |
| 145 | (economic adj5 (assistance or benefit?)).mp,kw.                                                                                                 | 6715  | Advanced |
| 146 | (financial adj5 (relief or assistance or support* or payment? or benefit? or plan or plans)).mp,kw.                                             | 13462 | Advanced |
| 147 | (financial adj3 (program* or aid)).mp,kw.                                                                                                       | 1258  | Advanced |
| 148 | (income adj2 (relief or assistance or support* or payment? or benefit? or replacement?)).mp,kw.                                                 | 1039  | Advanced |
| 149 | (income adj3 (plan or plans or program*)).mp,kw.                                                                                                | 1532  | Advanced |
| 150 | (monetary adj5 (relief or assistance or support* or payment? or benefit? or plan or plans or replacement?)).mp,kw.                              | 961   | Advanced |
| 151 | (monetary adj5 program*).mp,kw.                                                                                                                 | 133   | Advanced |
| 152 | (government adj2 (relief or assistance or support* or payment? or benefit?)).mp,kw.                                                             | 2041  | Advanced |
| 153 | (government adj5 (subsid* or aid)).mp,kw.                                                                                                       | 1073  | Advanced |
| 154 | (unemployment adj3 (relief or assistance or support* or payment? or benefit? or plan or plans or program* or replacement? or insurance)).mp,kw. | 544   | Advanced |
| 155 | (employment adj3 (relief or assistance or support* or payment? or benefit? or plan or plans or program* or replacement? or insurance)).mp,kw.   | 3864  | Advanced |
| 156 | (social adj2 (relief or assistance or payment?)).mp,kw.                                                                                         | 1166  | Advanced |
| 157 | (economic adj2 impact* adj2 pay*).mp.                                                                                                           | 11    | Advanced |
| 158 | (federal adj2 aid).mp,kw.                                                                                                                       | 86    | Advanced |
| 159 | (federal adj2 allocation?).mp,kw.                                                                                                               | 35    | Advanced |
| 160 | (public adj2 subsid*).mp,kw.                                                                                                                    | 278   | Advanced |

|     |                                                                                                            |       |          |
|-----|------------------------------------------------------------------------------------------------------------|-------|----------|
| 161 | (public adj2 assistance).mp,kw.                                                                            | 3768  | Advanced |
| 162 | (food adj5 (security or insecurity) adj5 (support* or benefit? or plan or plans or program or aid)).mp,kw. | 437   | Advanced |
| 163 | (food adj2 assistance).mp,kw.                                                                              | 1729  | Advanced |
| 164 | (food adj2 relief).mp,kw.                                                                                  | 68    | Advanced |
| 165 | (food adj2 aid).mp,kw.                                                                                     | 345   | Advanced |
| 166 | (food adj2 (fund? or funding)).mp,kw.                                                                      | 58    | Advanced |
| 167 | (emergency adj3 medical adj3 assistance).mp,kw.                                                            | 145   | Advanced |
| 168 | child welfare.mp,kw.                                                                                       | 23373 | Advanced |
| 169 | (charity or charities).mp,kw.                                                                              | 6514  | Advanced |
| 170 | almshous*.mp,kw.                                                                                           | 90    | Advanced |
| 171 | relief work?.mp,kw.                                                                                        | 4169  | Advanced |
| 172 | (humanitarian adj2 assistance).mp,kw.                                                                      | 353   | Advanced |
| 173 | (sick adj4 leave?).mp,kw.                                                                                  | 8864  | Advanced |
| 174 | medical leave?.mp,kw.                                                                                      | 261   | Advanced |
| 175 | disability leave?.mp,kw.                                                                                   | 56    | Advanced |
| 176 | (sick adj2 day?).mp,kw.                                                                                    | 1176  | Advanced |
| 177 | illness day?.mp,kw.                                                                                        | 132   | Advanced |
| 178 | sick absence?.mp,kw.                                                                                       | 45    | Advanced |
| 179 | illness absence?.mp,kw.                                                                                    | 56    | Advanced |
| 180 | family leave?.mp,kw.                                                                                       | 440   | Advanced |
| 181 | parental leave?.mp,kw.                                                                                     | 892   | Advanced |
| 182 | ((childcare or child-care) adj2 benefit?).mp,kw.                                                           | 33    | Advanced |
| 183 | ((childcare or child-care) adj2 support*).mp,kw.                                                           | 180   | Advanced |
| 184 | ((childcare or child-care) adj2 assistance).mp,kw.                                                         | 55    | Advanced |
| 185 | ((childcare or child-care) adj2 welfare).mp,kw.                                                            | 11    | Advanced |
| 186 | (disabilit* adj2 insurance).mp,kw.                                                                         | 2132  | Advanced |
| 187 | (worker?? adj2 compensation?).mp,kw.                                                                       | 9024  | Advanced |
| 188 | ((workm#n* or workwom#n*) adj2 compensation?).mp,kw.                                                       | 1495  | Advanced |
| 189 | (covid* adj3 response adj3 (grant* or fund*)).mp,kw.                                                       | 5     | Advanced |
| 190 | (debt? adj2 relie*).mp,kw.                                                                                 | 48    | Advanced |
| 191 | (defer* adj2 payment?).mp,kw.                                                                              | 7     | Advanced |
| 192 | emergency fund*3.mp,kw.                                                                                    | 144   | Advanced |
| 193 | emergency response benefit?.mp,kw.                                                                         | 0     | Advanced |
| 194 | foreign aid.mp,kw.                                                                                         | 714   | Advanced |

|     |                                                                                                                                                   |         |          |
|-----|---------------------------------------------------------------------------------------------------------------------------------------------------|---------|----------|
| 195 | humanitarian aid.mp,kw.                                                                                                                           | 392     | Advanced |
| 196 | ((relief or recovery) adj2 fund*3).mp,kw.                                                                                                         | 123     | Advanced |
| 197 | social protection program*.mp,kw.                                                                                                                 | 64      | Advanced |
| 198 | universal basic income?.mp.                                                                                                                       | 14      | Advanced |
| 199 | (Coronavirus Aid Relief adj2 Economic Security Act).mp,kw.                                                                                        | 4       | Advanced |
| 200 | CARES act.mp,kw.                                                                                                                                  | 15      | Advanced |
| 201 | (stimulus adj2 (cheque? or check? or payment? or money)).mp,kw.                                                                                   | 36      | Advanced |
| 202 | or/127-198 [ <b>economic relief terms</b> ]                                                                                                       | 123561  | Advanced |
| 203 | 126 and 202 [ <b>pandemic/infectious disease terms AND economic relief terms</b> ]                                                                | 6311    | Advanced |
| 204 | animals/ not (animals/ and humans/)                                                                                                               | 4847742 | Advanced |
| 205 | 203 not 204 [ <b>remove animal studies from the search</b> ]                                                                                      | 6283    | Advanced |
| 206 | limit 205 to (clinical conference or comment or consensus development conference or consensus development conference, nih or editorial or letter) | 324     | Advanced |
| 207 | 205 not 206 [ <b>conferences, editorials, letters, comments removed</b> ]                                                                         | 5959    | Advanced |
| 208 | remove duplicates from 207                                                                                                                        | 5949    | Advanced |
| 209 | limit 208 to yr="2001 -Current" [ <b>limited to results from the 21<sup>st</sup> century</b> ]                                                    | 4236    | Advanced |
